# Supplementary material
Source: PubMed Central journal article supplement (PMC5119029)
Supplement: AAC.01556-16_zac012165781s1.pdf [file AAC.01556-16_zac012165781s1.pdf]

## Supplemental material

Figure S1: Relative abundance of ARG genes normalized to *16S rRNA* at H1a (black), H1b (sparse), H2 (grey). Significant differences ( $p$  value <0.05, student t-test) were indicated by different letters (e.g., a and b, a and bc) on the top of each bar. No significant differences were indicated by the same letters (e.g., a and a, a and ab).

Figure S2. Principle component analysis of ARG, ARB and antibiotic concentrations for three groups of antibiotics in the hospital wastewater: (A) meropenem and ceftazidime, (B) sulfamethoxazole and trimethoprim, (C) amikacin and ciprofloxacin

Table S1. MDL, SPE recovery and overall recovery of the compounds

Table S2: PCR primers used in this study

Table S3. Identification of meropenem resistance isolates and PCR detection of corresponding ARG (i.e., *bla*<sub>NDM</sub>, *bla*<sub>KPC</sub>, *bla*<sub>CTX-M</sub>, *bla*<sub>SHV</sub>) and *int1* genes

Table S4. Identification of ceftazidime resistance isolates and PCR detection of corresponding ARG (i.e., *bla*<sub>NDM</sub>, *bla*<sub>KPC</sub>, *bla*<sub>CTX-M</sub>, *bla*<sub>SHV</sub>) and *int1* genes

Table S5. Identification of cotrimoxazole resistance isolates and PCR detection of corresponding ARG (i.e., *sul1*, *sul2*, and *dfrA*) and *int1* genes

Table S6. Identification of amikacin resistance isolates and PCR detection of corresponding ARG (i.e., *aac(6')-Ib*) and *int1* genes

Table S7. Identification of ciprofloxacin resistance isolates and PCR detection of corresponding ARG (i.e., *qnrA*, *qnrB*) and *int1* genes

Figure S1: Relative abundance of ARGs normalized to 16S rRNA at H1a (black), H1b (sparse), H2 (grey). Significant differences ( $p$  value  $<0.05$ , student t-test) were indicated by different letters (e.g., a and b, a and bc) on the top of each bar. No significant differences were indicated by the same letters (e.g., a and a, a and ab).

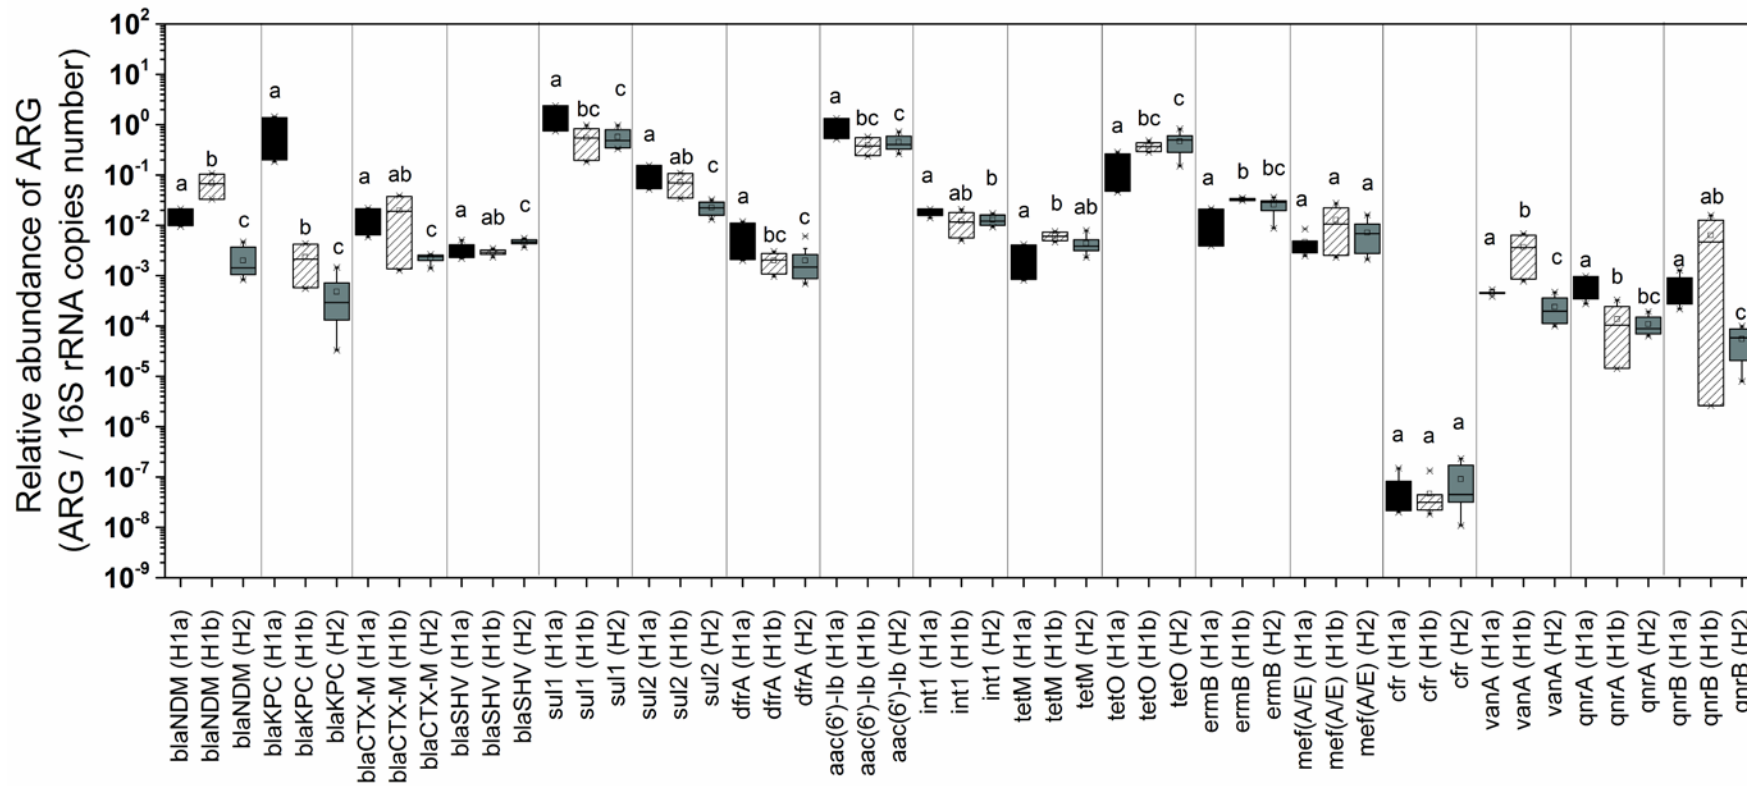

Figure S2. Principle component analysis of ARG, ARB and antibiotic concentrations for three groups of antibiotics in the hospital wastewater: (A) meropenem and ceftazidime, (B) sulfamethoxazole and trimethoprim, (C) amikacin and ciprofloxacin

(A)

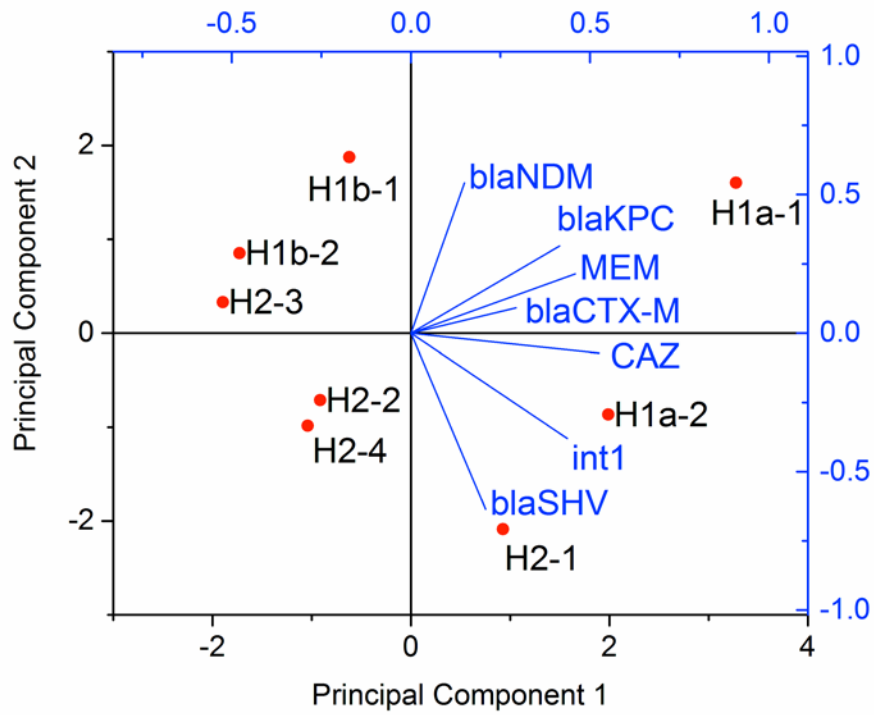

(B)

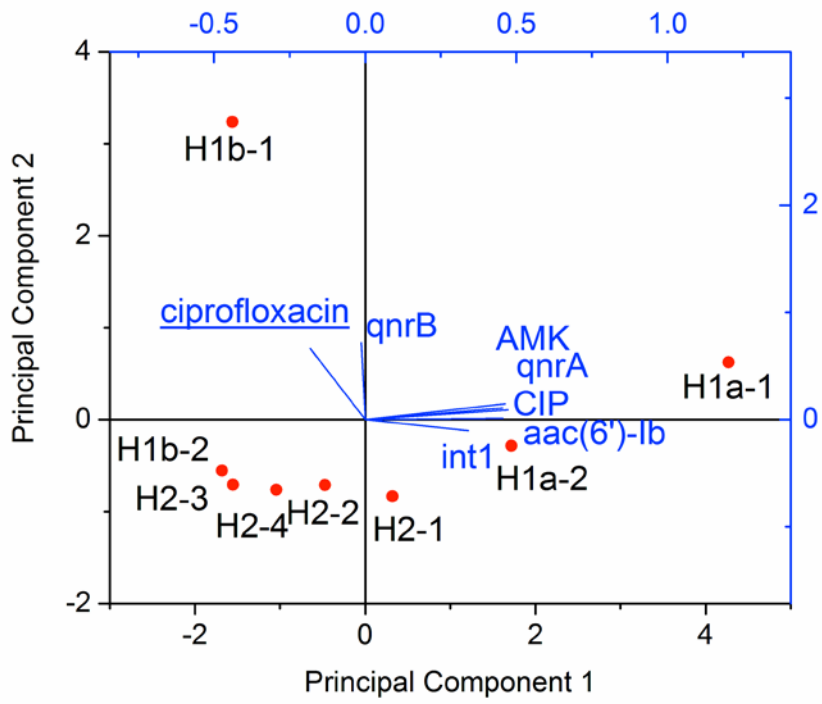

(C)

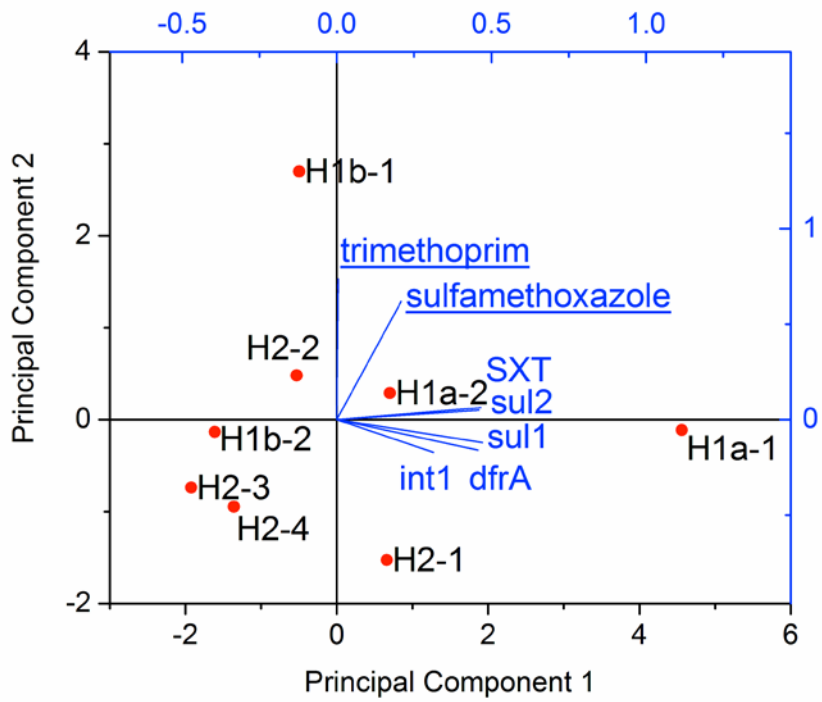

Table S1. MDL, SPE recovery and overall recovery of the compounds

| Compound                | MDL<br>(ng/L) | SPE recovery |     | Overall recovery |     |
|-------------------------|---------------|--------------|-----|------------------|-----|
|                         |               | Average      | RSD | Average          | RSD |
| <b>meropenem</b>        | 15.1          | 67%          | 9%  | 57%              | 10% |
| <b>lincomycin</b>       | 1.5           | 49%          | 7%  | 41%              | 12% |
| <b>sulfamethazine</b>   | 8.0           | 108%         | 2%  | 129%             | 5%  |
| <b>trimethoprim</b>     | 4.7           | 80%          | 8%  | 79%              | 23% |
| <b>tetracycline</b>     | 50.8          | 99%          | 20% | 88%              | 26% |
| <b>ciprofloxacin</b>    | 70.3          | 101%         | 13% | 94%              | 24% |
| <b>sulfamethoxazole</b> | 22.3          | 93%          | 12% | 109%             | 12% |
| <b>chloramphenicol</b>  | 18.9          | 100%         | 11% | 112%             | 10% |
| <b>azithromycin</b>     | 1.8           | 43%          | 7%  | 85%              | 24% |
| <b>clindamycin</b>      | 28.0          | 142%         | 13% | 96%              | 20% |
| <b>erythromycin</b>     | 172.1         | 87%          | 7%  | 85%              | 17% |
| <b>clarithromycin</b>   | 2.4           | 112%         | 11% | 102%             | 9%  |

Table S2: PCR primers used in this study

| Target genes               | Primer    | Sequences (5'-3')                  | Amplicon length (bp) | Ta (°C) | References |
|----------------------------|-----------|------------------------------------|----------------------|---------|------------|
| <i>16S rRNA</i>            | 16S EUB-f | ACT CCT ACG GGA GGC AGC AG         | 193                  | 64      | (1)        |
|                            | 16S EUB-r | ATT ACC GCG GCT GCT GG             |                      |         | (2)        |
| <i>aac(6')-Ib</i>          | aac6-f    | CAT ATC GTC GAG TGG TGG GG         | 264                  | 62      | This study |
|                            | aac6-r    | CTT GGT TCC CAA GCC TTT GC         |                      |         | This study |
| <i>bla<sub>SHV</sub></i>   | bla SHVf  | CGC TTT CCC ATG ATG AGC ACC TTT    | 109                  | 60      | (3)        |
|                            | bla SHVr  | TCC TGC TGG CGA TAG TGG ATC TTT    |                      |         | (3)        |
| <i>bla<sub>CTX-M</sub></i> | blaCTX-Mf | ATG TGC AGY ACC AGT AAR GTK ATG GC | 300                  | 60      | (4)        |
|                            | blaCTX-Mr | ATC ACK CGG RTC GCC XGG RAT        |                      |         | (4)        |
| <i>bla<sub>KPC</sub></i>   | blaKPC-f  | GAT ACC ACG TTC CGT CTG G          | 246                  | 60      | (5)        |
|                            | blaKPC-r  | GCA GGT TCC GGT TTT GTC TC         |                      |         | (5)        |
| <i>bla<sub>NDM</sub></i>   | blaNDM-f  | AAT GGC TCA TCA CGA TCA TGC        | 220                  | 60      | This study |
|                            | blaNDM-r  | GGC CCG CTC AAG GTA TTT TAC        |                      |         | This study |
| <i>cfr</i>                 | cfr-h2f   | TGA CCA CAA GCA GCG TCA AT         | 104                  | 60      | (6)        |
|                            | cfr-h2r   | AAC GAA GGG CAG GTA GAA GC         |                      |         | (6)        |
| <i>dfrA</i>                | dfrA-f    | ACG GAT CCT GGC TGT TGG TTG GAC GC | 237                  | 60      | (7)        |
|                            | dfrA-r    | CGG AAT TCA CCT TCC GGC TCG ATG TC |                      |         | (7)        |
| <i>erm(B)</i>              | ermB-f    | GGT TGC TCT TGC ACA CTC AAG        | 191                  | 62      | (8)        |
|                            | ermB-r    | CAG TTG ACG ATA TTC TCG ATT G      |                      |         | (8)        |
| <i>int1</i>                | int1-LC1  | GCC TTG ATG TTA CCC GAG AG         | 196                  | 60      | (9)        |
|                            | int1-LC5  | GAT CGG TCG AAT GCG TGT            |                      |         | (9)        |
| <i>mef(A/E)</i>            | mefAE-f   | AGT ATC ATT AAT CAC TAG TGC        | 346                  | 60.5    | (10)       |
|                            | mefAE-r   | TTC TTC TGG TAC TAA AAG TGG        |                      |         | (10)       |
| <i>qnrA</i>                | qnrAf     | ATT TCT CAC GCC AGG ATT TG         | 158                  | 60      | (11)       |
|                            | qnrAr     | GCA GAT CGG CAT AGC TGA AG         |                      |         | (11)       |

| Target genes  | Primer   | Sequences (5'-3')                            | Amplicon length (bp) | Ta (°C) | References |
|---------------|----------|----------------------------------------------|----------------------|---------|------------|
| <i>qnrB</i>   | qnrBf    | GGM ATH GAA ATT CGC CAC TG                   | 263                  | 60      | (11)       |
|               | qnrBr    | TTY GCB GYY CGC CAG TCG AA                   |                      |         | (11)       |
| <i>sul1</i>   | sul1-f   | CAC CGT TGG CCT TCC TGT AA                   | 180                  | 61      | This study |
|               | sul1-r   | TCT AAC CCT CGG TCT CTG GC                   |                      |         | This study |
| <i>sul2</i>   | sul2-f   | GCG CTC AAG GCA GAT GGC ATT                  | 293                  | 60      | (12)       |
|               | sul2-r   | GCG TTT GAT ACC GGC ACC CGT                  |                      |         | (12)       |
| <i>tet(M)</i> | tetM-f   | CC[TA] AC[AT] GTC ATT TAT ATG GA[GA] AGA CC  | 304                  | 62.5    | (13)       |
|               | tetM-r   | CGA AAA TCT GCT GG[CGA] GTA CT[GA] ACA GGG C |                      |         | (13)       |
| <i>tet(O)</i> | tetO-f   | AAG AAA ACA GGA GAT TCC AAA ACG              | 75                   | 60      | (14)       |
|               | tetO-r   | CGA GTC CCC AGA TTG TTT TTA GC               |                      |         | (14)       |
| <i>vanA</i>   | vanA-h2f | CAG CCT GAT TTG GTC CAC CT                   | 183                  | 60      | This study |
|               | vanA-h2r | GGC TCA TCC TTC GGT GTG AA                   |                      |         | This study |

Table S3. Identification of meropenem resistance isolates and PCR detection of corresponding ARGs (i.e., *bla*<sub>NDM</sub>, *bla*<sub>KPC</sub>, *bla*<sub>CTX-M</sub>, *bla*<sub>SHV</sub>) and *int1* genes

| Location                | Identification of bacterial isolates (n=24) | Meropenem resistance | <i>bla</i> <sub>NDM</sub> | <i>bla</i> <sub>KPC</sub> | <i>bla</i> <sub>CTX-M</sub> | <i>bla</i> <sub>SHV</sub> | <i>int1</i> |
|-------------------------|---------------------------------------------|----------------------|---------------------------|---------------------------|-----------------------------|---------------------------|-------------|
| H1a                     | <i>Enterobacter / Pantoea</i>               | 5                    | 1                         | 5                         | 2                           | 1                         | 5           |
| H1a                     | <i>Kluyvera georgiana</i>                   | 1                    | 0                         | 1                         | 1                           | 0                         | 1           |
| H1b                     | <i>Acinetobacter junii</i>                  | 1                    | 1                         | 0                         | 0                           | 0                         | 0           |
| H1b                     | <i>Comamonas testosteroni</i>               | 1                    | 1                         | 0                         | 1                           | 1                         | 1           |
| H1b                     | <i>Enterobacter / Pantoea</i>               | 1                    | 1                         | 1                         | 1                           | 0                         | 0           |
| H1b                     | <i>Pseudomonas spp.</i>                     | 3                    | 3                         | 0                         | 0                           | 0                         | 3           |
| H2                      | <i>Acinetobacter spp.</i>                   | 3                    | 1                         | 0                         | 0                           | 0                         | 2           |
| H2                      | <i>Aeromonas hydrophila</i>                 | 1                    | 0                         | 0                         | 0                           | 1                         | 0           |
| H2                      | <i>Elizabethkingia anophelis</i>            | 2                    | 0                         | 0                         | 0                           | 0                         | 2           |
| H2                      | <i>Klebsiella pneumoniae</i>                | 3                    | 1                         | 0                         | 0                           | 3                         | 2           |
| H2                      | <i>Pseudomonas spp.</i>                     | 2                    | 1                         | 0                         | 0                           | 0                         | 2           |
| H2                      | <i>Stenotrophomonas pavanii</i>             | 1                    | 0                         | 0                         | 0                           | 0                         | 0           |
| Percentage positive (%) |                                             | 100.0%               | 41.7%                     | 31.8%                     | 20.8%                       | 25.0%                     | 75%         |



Table S4: Identification of ceftazidime resistance isolates and PCR detection of corresponding ARGs (i.e., *bla*<sub>NDM</sub>, *bla*<sub>KPC</sub>, *bla*<sub>CTX-M</sub>, *bla*<sub>SHV</sub>) and *int1* genes

| Location                | Identification of bacterial isolates (n=24) | Ceftazidime resistance | <i>bla</i> <sub>NDM</sub> | <i>bla</i> <sub>KPC</sub> | <i>bla</i> <sub>CTX-M</sub> | <i>bla</i> <sub>SHV</sub> | <i>int1</i> |
|-------------------------|---------------------------------------------|------------------------|---------------------------|---------------------------|-----------------------------|---------------------------|-------------|
| H1a                     | <i>Aeromonas spp.</i>                       | 2                      | 0                         | 0                         | 0                           | 0                         | 2           |
| H1a                     | <i>Enterobacter / Pantoea</i>               | 2                      | 0                         | 1                         | 1                           | 0                         | 2           |
| H1a                     | <i>Klebsiella pneumoniae</i>                | 2                      | 0                         | 2                         | 1                           | 2                         | 2           |
| H1b                     | <i>Acinetobacter junii</i>                  | 3                      | 3                         | 0                         | 0                           | 2                         | 0           |
| H1b                     | <i>Shigella/E.coli</i>                      | 3                      | 0                         | 0                         | 3                           | 0                         | 3           |
| H2                      | <i>Aeromonas spp.</i>                       | 5                      | 0                         | 0                         | 0                           | 0                         | 4           |
| H2                      | <i>Elizabethkingia anophelis</i>            | 1                      | 0                         | 0                         | 0                           | 0                         | 0           |
| H2                      | <i>Klebsiella pneumoniae</i>                | 4                      | 0                         | 1                         | 2                           | 3                         | 3           |
| H2                      | <i>Pseudomonas spp.</i>                     | 2                      | 0                         | 0                         | 0                           | 0                         | 2           |
| Percentage positive (%) |                                             | 100.0%                 | 12.5%                     | 17.4%                     | 29.2%                       | 29.2%                     | 75%         |

Table S5: Identification of cotrimoxazole resistance isolates and PCR detection of corresponding ARGs (i.e., *sul1*, *sul2*, and *dfrA*) and *int1* genes

| Location                | Identification of bacterial isolates (n=24) | Cotrimoxazole resistance | <i>sul1</i> | <i>sul2</i> | <i>dfrA</i> | <i>int1</i> |
|-------------------------|---------------------------------------------|--------------------------|-------------|-------------|-------------|-------------|
| H1a                     | <i>Enterobacter spp.</i>                    | 3                        | 1           | 0           | 0           | 2           |
| H1a                     | <i>Klebsiella pneumoniae</i>                | 3                        | 2           | 0           | 0           | 3           |
| H1b                     | <i>Acinetobacter spp.</i>                   | 3                        | 3           | 0           | 0           | 1           |
| H1b                     | <i>Shigella / E.coli</i>                    | 3                        | 3           | 0           | 0           | 3           |
| H2                      | <i>Aeromonas spp.</i>                       | 2                        | 2           | 0           | 0           | 2           |
| H2                      | <i>Citrobacter amalonaticus</i>             | 1                        | 1           | 0           | 0           | 1           |
| H2                      | <i>Enterobacter spp.</i>                    | 1                        | 1           | 0           | 0           | 1           |
| H2                      | <i>Klebsiella pneumoniae</i>                | 3                        | 2           | 0           | 0           | 3           |
| H2                      | <i>Pseudomonas spp.</i>                     | 2                        | 2           | 0           | 0           | 2           |
| H2                      | <i>Shigella/E.coli</i>                      | 3                        | 3           | 0           | 0           | 3           |
| Percentage positive (%) |                                             | 100.0%                   | 83.3%       | 0.0%        | 0.0%        | 95.5%       |

Table S6: Identification of amikacin resistance isolates and PCR detection of corresponding ARGs (i.e., *aac(6')-Ib*) and *int1* genes

| Location                | Identification of bacterial isolates (n=23) | Amikacin resistance | <i>aac(6')-Ib</i> | <i>int1</i> |
|-------------------------|---------------------------------------------|---------------------|-------------------|-------------|
| H1a                     | <i>Aeromonas spp.</i>                       | 1                   | 1                 | 1           |
| H1a                     | <i>Enterobacter / Pantoea</i>               | 3                   | 3                 | 3           |
| H1a                     | <i>Klebsiella spp.</i>                      | 2                   | 2                 | 2           |
| H1b                     | <i>Acinetobacter spp.</i>                   | 2                   | 2                 | 1           |
| H1b                     | <i>Shigella / E.coli</i>                    | 3                   | 3                 | 2           |
| H2                      | <i>Aeromonas spp.</i>                       | 3                   | 3                 | 3           |
| H2                      | <i>Elizabethkingia anophelis</i>            | 1                   | 1                 | 0           |
| H2                      | <i>Enterobacter hormaechei</i>              | 1                   | 0                 | 1           |
| H2                      | <i>Klebsiella pneumoniae</i>                | 5                   | 5                 | 5           |
| H2                      | <i>Proteus mirabilis</i>                    | 1                   | 1                 | 1           |
| Percentage positive (%) |                                             | 100.0%              | 95.5%             | 86.4%       |

Table S7: Identification of ciprofloxacin resistance isolates and PCR detection of corresponding ARGs (i.e., *qnrA*, *qnrB*) and *int1* genes

| Location                | Identification of bacterial isolates<br>(n=24) | Ciprofloxacin<br>resistance | <i>qnrA</i> | <i>qnrB</i> | <i>int1</i> |
|-------------------------|------------------------------------------------|-----------------------------|-------------|-------------|-------------|
| H1a                     | <i>Aeromonas hydrophila</i>                    | 3                           | 0           | 0           | 3           |
| H1a                     | <i>Klebsiella pneumoniae</i>                   | 3                           | 0           | 0           | 3           |
| H1b                     | <i>Citrobacter freundii</i>                    | 1                           | 1           | 1           | 1           |
| H1b                     | <i>Shigella / E.coli</i>                       | 5                           | 0           | 1           | 3           |
| H2                      | <i>Aeromonas hydrophila</i>                    | 2                           | 0           | 1           | 2           |
| H2                      | <i>Citrobacter freundii</i>                    | 1                           | 0           | 1           | 1           |
| H2                      | <i>Comamonas testosteroni</i>                  | 1                           | 0           | 0           | 1           |
| H2                      | <i>Enterobacter spp.</i>                       | 3                           | 1           | 0           | 2           |
| H2                      | <i>Klebsiella pneumoniae</i>                   | 3                           | 0           | 0           | 3           |
| H2                      | <i>Pseudomonas spp.</i>                        | 1                           | 0           | 0           | 1           |
| Percentage positive (%) |                                                | 100.0%                      | 8.7%        | 17.4%       | 87.0%       |

## References

1. **Amann RI, Binder BJ, Olson RJ, Chisholm SW, Devereux R, Stahl DA.** 1990. Combination of 16S rRNA-targeted oligonucleotide probes with flow cytometry for analyzing mixed microbial populations. *Applied and Environmental Microbiology* **56**:7.
2. **Muyzer G, de Waal EC, Uitterlinden AG.** 1993. Profiling of complex microbial populations by denaturing gradient gel electrophoresis analysis of polymerase chain reaction-amplified genes coding for 16S rRNA. *Applied and Environmental Microbiology* **59**:6.
3. **Xi C, Zhang Y, Marrs CF, Ye W, Simon C, Foxman B, Nriagu J.** 2009. Prevalence of antibiotic resistance in drinking water treatment and distribution systems. *Appl Environ Microbiol* **75**:5714-5718.
4. **Birkett CI, Ludlam HA, Woodford N, Brown DFJ, Brown NM, Roberts MTM, Milner N, Curran MD.** 2007. Real-time TaqMan PCR for rapid detection and typing of genes encoding CTX-M extended-spectrum  $\beta$ -lactamases. *Journal of Medical Microbiology* **56**:52-55.
5. **Hindiye M, Smollen G, Grossman Z, Ram D, Davidson Y, Mileguir F, Vax M, Ben David D, Tal I, Rahav G, Shamiss A, Mendelson E, Keller N.** 2008. Rapid Detection of blaKPC Carbapenemase Genes by Real-Time PCR. *Journal of Clinical Microbiology* **46**:2879-2883.
6. **Long KS, Poehlsgaard J, Kehrenberg C, Schwarz S, Vester B.** 2006. The Cfr rRNA methyltransferase confers resistance to Phenicol, Lincosamides, Oxazolidinones, Pleuromutilins, and Streptogramin A antibiotics. *Antimicrob Agents Chemother* **50**:2500-2505.
7. **Lee JC, Oh JY, Cho JW, Park JC, Kim JM, Seo SY, Cho DT.** 2001. The prevalence of trimethoprim-resistance-conferring dihydrofolate reductase genes in urinary isolates of Escherichia coli in Korea. *Journal of Antimicrobial Chemotherapy* **47**:6.
8. **Koike S, Aminov RI, Yannarell AC, Gans HD, Krapac IG, Chee-Sanford JC, Mackie RI.** 2010. Molecular ecology of macrolide-lincosamide-streptogramin B methylases in waste lagoons and subsurface waters associated with swine production. *Microbial Ecology* **59**:12.
9. **Barraud O, Baclet MC, Denis F, Ploy MC.** 2010. Quantitative multiplex real-time PCR for detecting class 1, 2 and 3 integrons. *J Antimicrob Chemother* **65**:1642-1645.
10. **Gygax SE, Schuyler JA, Kimmel LE, Trama JP, Mordechai E, Adelson ME.** 2006. Erythromycin and Clindamycin Resistance in Group B Streptococcal Clinical Isolates. *ANTIMICROBIAL AGENTS AND CHEMOTHERAPY* **50**:1875-1877.
11. **Marti E, Balcazar JL.** 2013. Real-Time PCR assays for quantification of qnr genes in environmental water samples and chicken feces. *Appl Environ Microbiol* **79**:1743-1745.

12. **Dahmen S, Mansour W, Boujaafar N, Arlet G, Boualle`gue O.** 2010. Distribution of Cotrimoxazole Resistance Genes Associated with Class 1 Integrons in Clinical Isolates of Enterobacteriaceae in a University Hospital in Tunisia. MICROBIAL DRUG RESISTANCE **16**:5.
13. **Dorsch MR.** 2007. Rapid Detection of Bacterial Antibiotic Resistance: Preliminary Evaluation of PCR Assays Targeting Tetracycline Resistance Genes. Human Protection and Performance Division. DSTO Defence Science and Technology Organisation, Australia.
14. **Smith MS, Yang RK, Knapp CW, Niu Y, Peak N, Hanfelt MM, Galland JC, Graham DW.** 2004. Quantification of Tetracycline Resistance Genes in Feedlot Lagoons by Real-Time PCR. Applied and Environmental Microbiology **70**:7372-7377.
